# Supplementary material
Source: HighWire-hosted journal article supplement (https://www.genetics.org/content/suppl/2010/05/03/genetics.110.116863)
Supplement: FigureS4.pdf [file FigureS4.pdf]

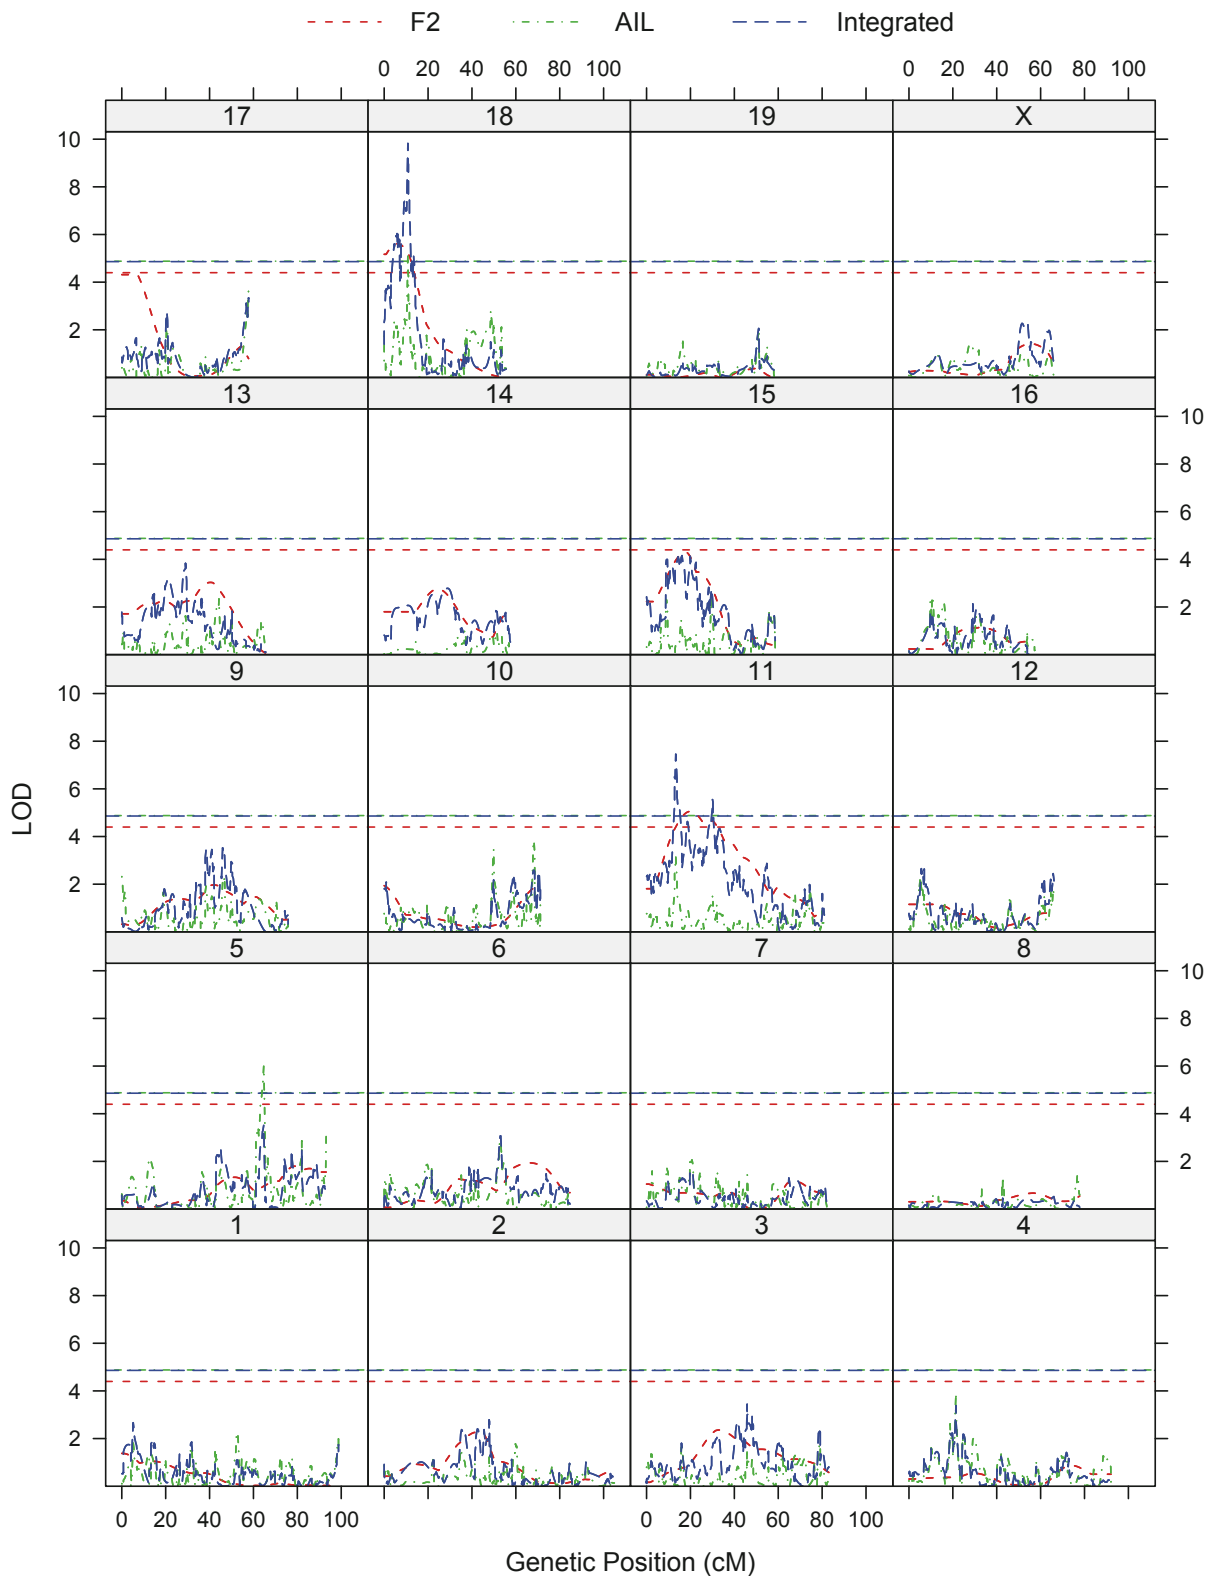

FIGURE S4.—QTLs identified on each chromosome using Haley-Knott interval mapping for F<sub>2</sub> (red), AIL (green) and the integration of F<sub>2</sub> and AIL (blue). Relatedness was accounted for using a mixed model as described in the text. The genome-wide significance thresholds ( $p < 0.05$ ) are indicated by horizontal lines and were determined using gene dropping. These are results for the analysis of behavior on the *third* test day, when methamphetamine was administered.
